# Supplementary material
Source: PubMed Central journal article supplement (PMC10468817)
Supplement: NIHMS1927098-supplement-Supplementary_data.pdf [file NIHMS1927098-supplement-Supplementary_data.pdf]

## Supplemental Information

| <b>SUPPLEMENTAL TABLE 3</b> Outcomes for Sequential Analyses and Descriptive Monitoring Following COVID-19 Vaccination in the Vaccine Safety Datalink |                   |         |                                                                                                                                                                                |                                |
|-------------------------------------------------------------------------------------------------------------------------------------------------------|-------------------|---------|--------------------------------------------------------------------------------------------------------------------------------------------------------------------------------|--------------------------------|
| Outcome <sup>a</sup>                                                                                                                                  |                   |         |                                                                                                                                                                                |                                |
| Sequential Analyses                                                                                                                                   | Risk Interval     | Setting | ICD-10 Codes                                                                                                                                                                   | Medical Record Review          |
| Acute disseminated encephalomyelitis                                                                                                                  | 1–21 d            | E, I    | G04.00, G04.02                                                                                                                                                                 | Yes, prespecified <sup>b</sup> |
| Acute myocardial infarction                                                                                                                           | 1–21 d            | E, I    | I21.*                                                                                                                                                                          | No                             |
| Appendicitis                                                                                                                                          | 1–21 d            | E, I    | K35.*, K36, K37, K38.8                                                                                                                                                         | No                             |
| Bell's palsy                                                                                                                                          | 1–21 d            | E, I, O | G51.0                                                                                                                                                                          | No                             |
| Cerebral venous sinus thrombosis                                                                                                                      | 1–21 d            | E, I    | G08, I63.6, I67.6                                                                                                                                                              | Yes, prespecified <sup>b</sup> |
| Convulsions or seizures                                                                                                                               | 0–7 d, 0–21 d     | E, I    | R56.0*, R56.9                                                                                                                                                                  | No                             |
| Disseminated intravascular coagulation                                                                                                                | 1–21 d            | E, I    | D65                                                                                                                                                                            | No                             |
| Encephalitis, myelitis, or encephalomyelitis                                                                                                          | 1–21 d            | E, I    | G04.30, G04.32, G04.39, G04.8*, G04.9*, G05.*, G37.4                                                                                                                           | No                             |
| Guillain-Barré syndrome                                                                                                                               | 1–21 d            | E, I    | G61.0                                                                                                                                                                          | Yes, prespecified <sup>b</sup> |
| Immune thrombocytopenia                                                                                                                               | 1–21 d            | E, I, O | D69.3                                                                                                                                                                          | No                             |
| Kawasaki disease                                                                                                                                      | 1–21 d            | E, I    | M30.3                                                                                                                                                                          | Yes, post hoc                  |
| Myocarditis or pericarditis                                                                                                                           | 1–21 d            | E, I    | B33.22, B33.23, I30.*, I31.9, I40.*, I51.4                                                                                                                                     | Yes, prespecified <sup>b</sup> |
| Pulmonary embolism                                                                                                                                    | 1–21 d            | E, I    | I26.*                                                                                                                                                                          | No                             |
| Stroke, hemorrhagic                                                                                                                                   | 1–21 d            | E, I    | I60.*, I61.*, I62.*                                                                                                                                                            | Yes, post hoc <sup>b</sup>     |
| Stroke, ischemic                                                                                                                                      | 1–21 d            | E, I    | G45.8, G45.9, I63.*                                                                                                                                                            | No                             |
| Thrombosis with thrombocytopenia syndrome                                                                                                             | 1–21 d            | E, I    | Platelet count < 150 000 per microliter and 1 of the following ICD-10 codes: G08, I63.6, I67.6, I74.0*, I74.1*, I74.3, I74.5, I74.8, I74.9, I81, I82.0, I82.890, K55.0*, N28.0 | No                             |
| Thrombotic thrombocytopenic purpura                                                                                                                   | 1–21 d            | E, I    | M31.1                                                                                                                                                                          | No                             |
| Transverse myelitis                                                                                                                                   | 1–21 d            | E, I    | G37.3                                                                                                                                                                          | Yes, prespecified <sup>b</sup> |
| Venous thromboembolism                                                                                                                                | 1–21 d            | E, I, O | I26.*, I82.210, I82.220, I82.290, I82.3, I82.4*, I82.60*, I82.62*, I82.A1*, I82.B1*, I82.C1*, I82.890, I82.90                                                                  | No                             |
| Descriptive monitoring                                                                                                                                | Monitoring period | Setting | ICD-10 codes                                                                                                                                                                   | Medical record review          |
| Acute respiratory distress syndrome                                                                                                                   | 0–84 d            | E, I    | J80                                                                                                                                                                            | No                             |
| Anaphylaxis                                                                                                                                           | 0–1 d             | E, I    | T78.2*, T80.52*, T88.6*                                                                                                                                                        | Yes, prespecified              |
| MIS-C                                                                                                                                                 | 0–84 d            | E, I    | M35.81                                                                                                                                                                         | Yes, prespecified <sup>b</sup> |
| Narcolepsy or cataplexy                                                                                                                               | 0–84 d            | E, I, O | G47.41*                                                                                                                                                                        | No                             |

E, emergency department; I, inpatient; ICD-10, International Classification of Diseases, Tenth Revision, Clinical Modification; O, outpatient; \*, wildcard.

<sup>a</sup> Additional information on outcome definitions, including exclusions and onset adjustments, is available at <https://www.cdc.gov/vaccinesafety/pdf/COVID19-RCA-Protocol-1342-508.pdf> or <https://doi.org/10.1001/jama.2021.15072>. All outcomes are the first since October 1, 2015 (the start of ICD-10 implementation within VSD) except myocarditis and pericarditis, which is first in 60 d, and anaphylaxis, which is first in 7 d.

<sup>b</sup> All electronically identified outcomes up to 84 d following COVID-19 vaccination were reviewed.
